# Supplementary material for: Identification of microRNAs That Regulate TLR2-Mediated Trophoblast Apoptosis and Inhibition of IL-6 mRNA
Source: PubMed Central journal article supplement (PMC3797072; doi:10.1371/journal.pone.0077249), 2013-10-15
Supplement: pone.0077249.s002.pdf [file pone.0077249.s002.pdf]

**Table S1**

| Predicted miRNA targeting NF- $\kappa$ B p65 mRNA | Expression level | TLR6 <sup>-</sup> |         |              | TLR6 <sup>+</sup> |         |              |
|---------------------------------------------------|------------------|-------------------|---------|--------------|-------------------|---------|--------------|
|                                                   |                  | NT                | PDG     | Fold change  | NT                | PDG     | Fold change  |
| Hsa-miR-7-5p                                      | High             | 1,759.5           | 1,525.3 | <b>0.867</b> | 1,666.6           | 1,572.4 | <b>0.943</b> |
| Hsa-miR-186-5p                                    | High             | 1,490.9           | 1,034.8 | <b>0.694</b> | 1,822.1           | 1,475.8 | <b>0.810</b> |
| Hsa-miR-22-3p                                     | High             | 7,102.8           | 5,079.6 | <b>0.715</b> | 5,847.1           | 5,583.8 | <b>0.955</b> |
| Hsa-miR-185-5p                                    | Low              | 532.7             | 440.3   | <b>0.826</b> | 467.1             | 491.6   | <b>1.052</b> |
| Hsa-miR-362-3p                                    | Low              | 173.4             | 109.9   | <b>0.634</b> | 156.5             | 171.9   | <b>1.099</b> |
| Hsa-miR-138-5p                                    | Very Low         | 117.0             | 84.0    | <b>0.718</b> | 99.7              | 122.2   | <b>1.225</b> |
